# Supplementary material for: The accuracy and quality of image-based artificial intelligence for muscle-invasive bladder cancer prediction
Source: PubMed Central journal article supplement (PMC11294512; doi:10.1186/s13244-024-01780-y), 2024-08-01
Supplement: 13244_2024_1780_MOESM1_ESM.pdf [file 13244_2024_1780_MOESM1_ESM.pdf]

# The accuracy and quality of image-based artificial intelligence for muscle-invasive bladder cancer prediction

## ELECTRONIC SUPPLEMENTARY MATERIAL

### Supplementary Material 1.

| Section and Topic             | Item # | Checklist item                                                                                                                                                                                                                                                                                       | Location where item is reported |
|-------------------------------|--------|------------------------------------------------------------------------------------------------------------------------------------------------------------------------------------------------------------------------------------------------------------------------------------------------------|---------------------------------|
| <b>TITLE</b>                  |        |                                                                                                                                                                                                                                                                                                      |                                 |
| Title                         | 1      | Identify the report as a systematic review.                                                                                                                                                                                                                                                          | Page 1                          |
| <b>ABSTRACT</b>               |        |                                                                                                                                                                                                                                                                                                      |                                 |
| Abstract                      | 2      | See the PRISMA 2020 for Abstracts checklist.                                                                                                                                                                                                                                                         | Page 1                          |
| <b>INTRODUCTION</b>           |        |                                                                                                                                                                                                                                                                                                      |                                 |
| Rationale                     | 3      | Describe the rationale for the review in the context of existing knowledge.                                                                                                                                                                                                                          | Page 3                          |
| Objectives                    | 4      | Provide an explicit statement of the objective(s) or question(s) the review addresses.                                                                                                                                                                                                               | Page 4                          |
| <b>METHODS</b>                |        |                                                                                                                                                                                                                                                                                                      |                                 |
| Eligibility criteria          | 5      | Specify the inclusion and exclusion criteria for the review and how studies were grouped for the syntheses.                                                                                                                                                                                          | Page 4                          |
| Information sources           | 6      | Specify all databases, registers, websites, organisations, reference lists and other sources searched or consulted to identify studies. Specify the date when each source was last searched or consulted.                                                                                            | Page 4                          |
| Search strategy               | 7      | Present the full search strategies for all databases, registers and websites, including any filters and limits used.                                                                                                                                                                                 | ESM1                            |
| Selection process             | 8      | Specify the methods used to decide whether a study met the inclusion criteria of the review, including how many reviewers screened each record and each report retrieved, whether they worked independently, and if applicable, details of automation tools used in the process.                     | Page 4                          |
| Data collection process       | 9      | Specify the methods used to collect data from reports, including how many reviewers collected data from each report, whether they worked independently, any processes for obtaining or confirming data from study investigators, and if applicable, details of automation tools used in the process. | Page 4                          |
| Data items                    | 10a    | List and define all outcomes for which data were sought. Specify whether all results that were compatible with each outcome domain in each study were sought (e.g. for all measures, time points, analyses), and if not, the methods used to decide which results to collect.                        | Page 4                          |
|                               | 10b    | List and define all other variables for which data were sought (e.g. participant and intervention characteristics, funding sources). Describe any assumptions made about any missing or unclear information.                                                                                         | Page 5                          |
| Study risk of bias assessment | 11     | Specify the methods used to assess risk of bias in the included studies, including details of the tool(s) used, how many reviewers assessed each study and whether they worked independently, and if applicable, details of automation tools used in the process.                                    | Page 5                          |
| Effect measures               | 12     | Specify for each outcome the effect measure(s) (e.g. risk ratio, mean difference) used in the synthesis or presentation of results.                                                                                                                                                                  | Page 5                          |

Insights Imaging (2024) He C, Xu H, Yuan E, et al.

| Section and Topic             | Item # | Checklist item                                                                                                                                                                                                                                                                       | Location where item is reported |
|-------------------------------|--------|--------------------------------------------------------------------------------------------------------------------------------------------------------------------------------------------------------------------------------------------------------------------------------------|---------------------------------|
| Synthesis methods             | 13a    | Describe the processes used to decide which studies were eligible for each synthesis (e.g. tabulating the study intervention characteristics and comparing against the planned groups for each synthesis (item #5)).                                                                 | Page 5                          |
|                               | 13b    | Describe any methods required to prepare the data for presentation or synthesis, such as handling of missing summary statistics, or data conversions.                                                                                                                                | Page 5-7                        |
|                               | 13c    | Describe any methods used to tabulate or visually display results of individual studies and syntheses.                                                                                                                                                                               | Page 5, ESM 2                   |
|                               | 13d    | Describe any methods used to synthesize results and provide a rationale for the choice(s). If meta-analysis was performed, describe the model(s), method(s) to identify the presence and extent of statistical heterogeneity, and software package(s) used.                          | Page 6                          |
|                               | 13e    | Describe any methods used to explore possible causes of heterogeneity among study results (e.g. subgroup analysis, meta-regression).                                                                                                                                                 | Page 6                          |
|                               | 13f    | Describe any sensitivity analyses conducted to assess robustness of the synthesized results.                                                                                                                                                                                         | Page 6                          |
| Reporting bias assessment     | 14     | Describe any methods used to assess risk of bias due to missing results in a synthesis (arising from reporting biases).                                                                                                                                                              | Page 5-6                        |
| Certainty assessment          | 15     | Describe any methods used to assess certainty (or confidence) in the body of evidence for an outcome.                                                                                                                                                                                | Page 6                          |
| <b>RESULTS</b>                |        |                                                                                                                                                                                                                                                                                      |                                 |
| Study selection               | 16a    | Describe the results of the search and selection process, from the number of records identified in the search to the number of studies included in the review, ideally using a flow diagram.                                                                                         | Page 4                          |
|                               | 16b    | Cite studies that might appear to meet the inclusion criteria, but which were excluded, and explain why they were excluded.                                                                                                                                                          | Page 5-7                        |
| Study characteristics         | 17     | Cite each included study and present its characteristics.                                                                                                                                                                                                                            | Page 7, table                   |
| Risk of bias in studies       | 18     | Present assessments of risk of bias for each included study.                                                                                                                                                                                                                         | Page 8-10, ESM 3                |
| Results of individual studies | 19     | For all outcomes, present, for each study: (a) summary statistics for each group (where appropriate) and (b) an effect estimate and its precision (e.g. confidence/credible interval), ideally using structured tables or plots.                                                     | Page 10, ESM 2-3                |
| Results of syntheses          | 20a    | For each synthesis, briefly summarise the characteristics and risk of bias among contributing studies.                                                                                                                                                                               | Page 8-10                       |
|                               | 20b    | Present results of all statistical syntheses conducted. If meta-analysis was done, present for each the summary estimate and its precision (e.g. confidence/credible interval) and measures of statistical heterogeneity. If comparing groups, describe the direction of the effect. | Page 10                         |
|                               | 20c    | Present results of all investigations of possible causes of heterogeneity among study results.                                                                                                                                                                                       | Page 10                         |
|                               | 20d    | Present results of all sensitivity analyses conducted to assess the robustness of the synthesized results.                                                                                                                                                                           | Page 10                         |
| Reporting biases              | 21     | Present assessments of risk of bias due to missing results (arising from reporting biases) for each synthesis assessed.                                                                                                                                                              | Page 10                         |
| Certainty of evidence         | 22     | Present assessments of certainty (or confidence) in the body of evidence for each outcome assessed.                                                                                                                                                                                  | Page 8-12                       |
| <b>DISCUSSION</b>             |        |                                                                                                                                                                                                                                                                                      |                                 |
| Discussion                    | 23a    | Provide a general interpretation of the results in the context of other evidence.                                                                                                                                                                                                    | Page 11                         |

Insights Imaging (2024) He C, Xu H, Yuan E, et al.

| Section and Topic                              | Item # | Checklist item                                                                                                                                                                                                                             | Location where item is reported                                           |
|------------------------------------------------|--------|--------------------------------------------------------------------------------------------------------------------------------------------------------------------------------------------------------------------------------------------|---------------------------------------------------------------------------|
|                                                | 23b    | Discuss any limitations of the evidence included in the review.                                                                                                                                                                            | Page 12                                                                   |
|                                                | 23c    | Discuss any limitations of the review processes used.                                                                                                                                                                                      | Page 12                                                                   |
|                                                | 23d    | Discuss implications of the results for practice, policy, and future research.                                                                                                                                                             | Page 12                                                                   |
| <b>OTHER INFORMATION</b>                       |        |                                                                                                                                                                                                                                            |                                                                           |
| Registration and protocol                      | 24a    | Provide registration information for the review, including register name and registration number, or state that the review was not registered.                                                                                             | International Prospective Register of Systematic Reviews (CRD42023446035) |
|                                                | 24b    | Indicate where the review protocol can be accessed, or state that a protocol was not prepared.                                                                                                                                             | Page 4                                                                    |
|                                                | 24c    | Describe and explain any amendments to information provided at registration or in the protocol.                                                                                                                                            | Page 4                                                                    |
| Support                                        | 25     | Describe sources of financial or non-financial support for the review, and the role of the funders or sponsors in the review.                                                                                                              | Declarations                                                              |
| Competing interests                            | 26     | Declare any competing interests of review authors.                                                                                                                                                                                         | Declarations                                                              |
| Availability of data, code and other materials | 27     | Report which of the following are publicly available and where they can be found: template data collection forms; data extracted from included studies; data used for all analyses; analytic code; any other materials used in the review. | Declarations                                                              |

From: Page MJ, McKenzie JE, Bossuyt PM, Boutron I, Hoffmann TC, Mulrow CD, et al. The PRISMA 2020 statement: an updated guideline for reporting systematic reviews. *BMJ* 2021;372:n71. doi: 10.1136/bmj.n71  
For more information, visit: <http://www.prisma-statement.org/>

## Supplementary Material 2:

### Appendix 1. Search queries

| Step | Query                                                                              |
|------|------------------------------------------------------------------------------------|
| 1    | (artificial intelligence OR machine learning OR radiomic* OR deep learning).af     |
| 2    | (bladder cancer OR bladder carcinoma OR urothelial carcinoma).af                   |
| 3    | (stage OR staging OR muscle invasi*).af                                            |
| 4    | (computed tomography OR CT OR magnetic resonance imaging OR MRI OR ultrasound) .af |
| 5    | English.lg                                                                         |
| 6    | 1 AND 2 AND 3 AND 4 AND 5                                                          |

## Supplementary Figures

Figure S1. The ROC plot for CT in the prediction of muscle-invasive bladder cancer

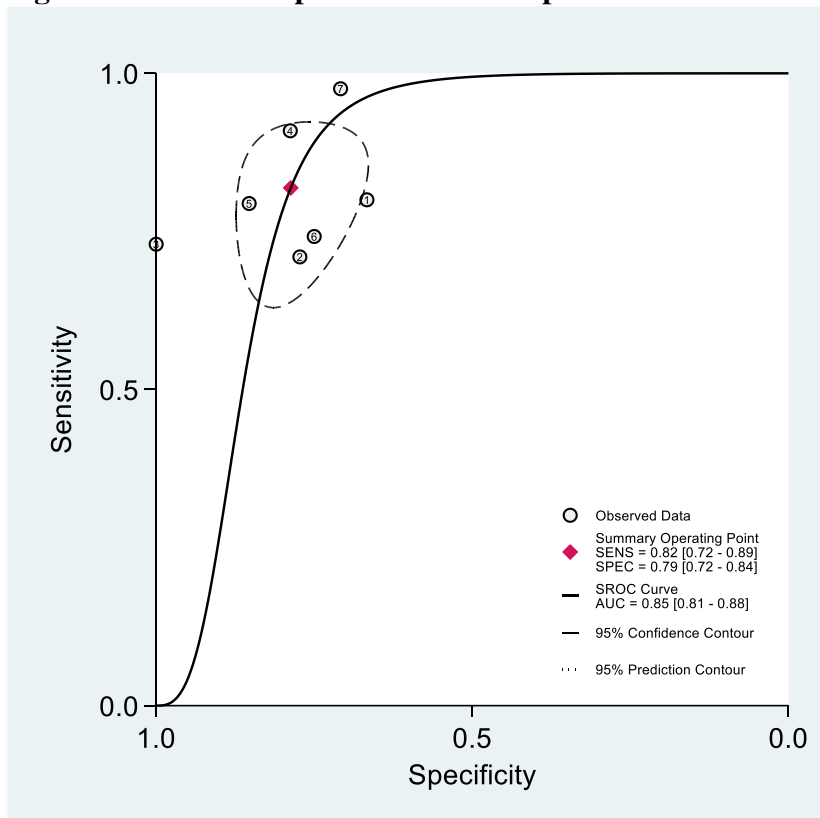

**Figure S2. The forest plot for CT in the prediction of muscle-invasive bladder cancer**

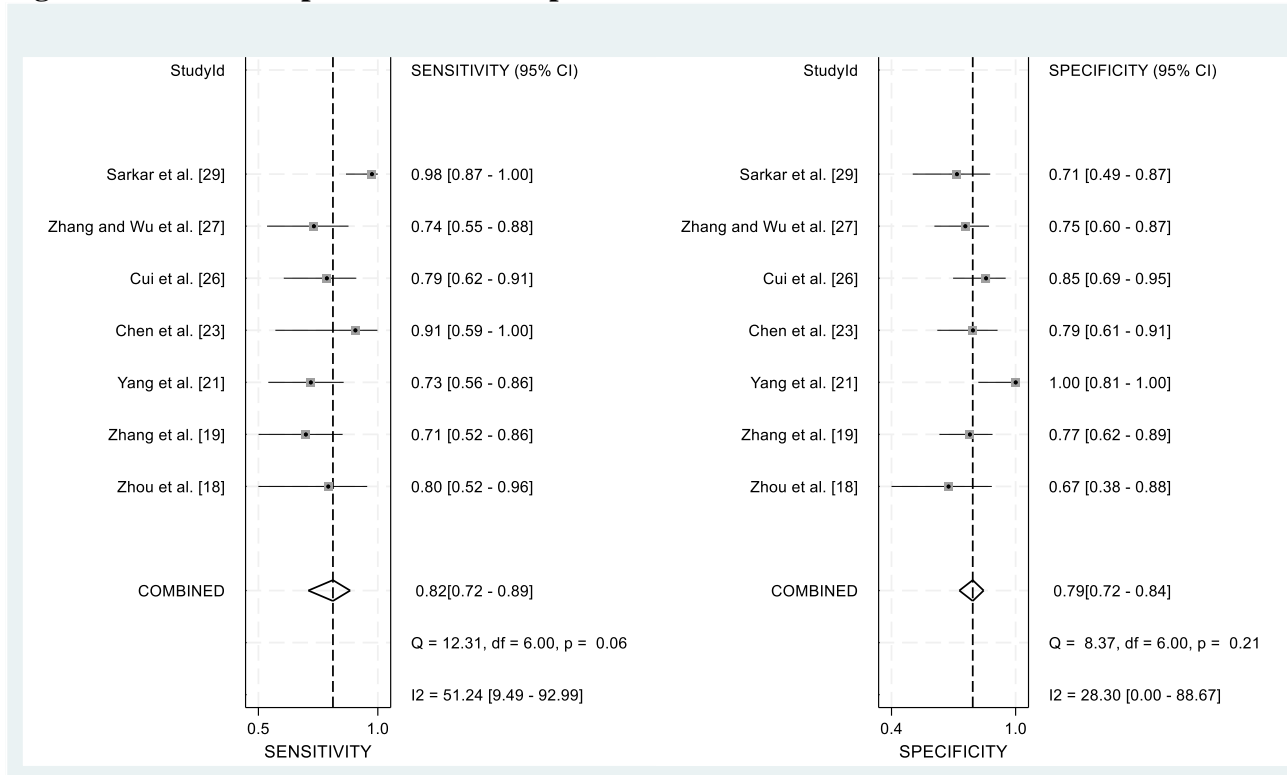

**Figure S3. The ROC plot for MRI in the prediction of muscle-invasive bladder cancer**

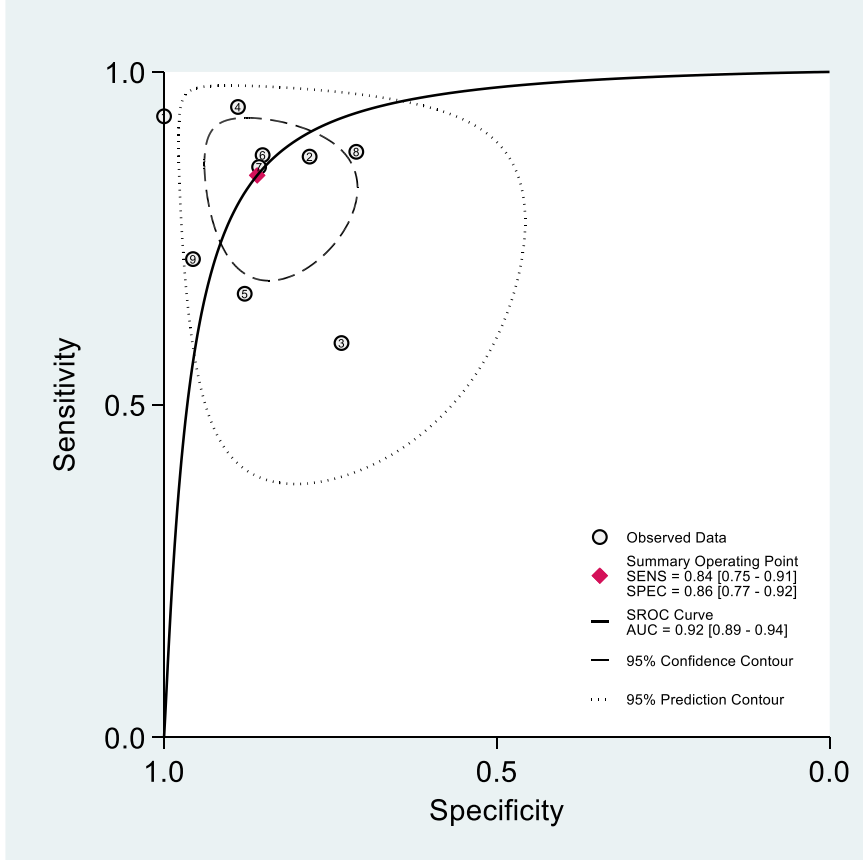

**Figure S4. The forest plot for MRI in the prediction of muscle-invasive bladder cancer**

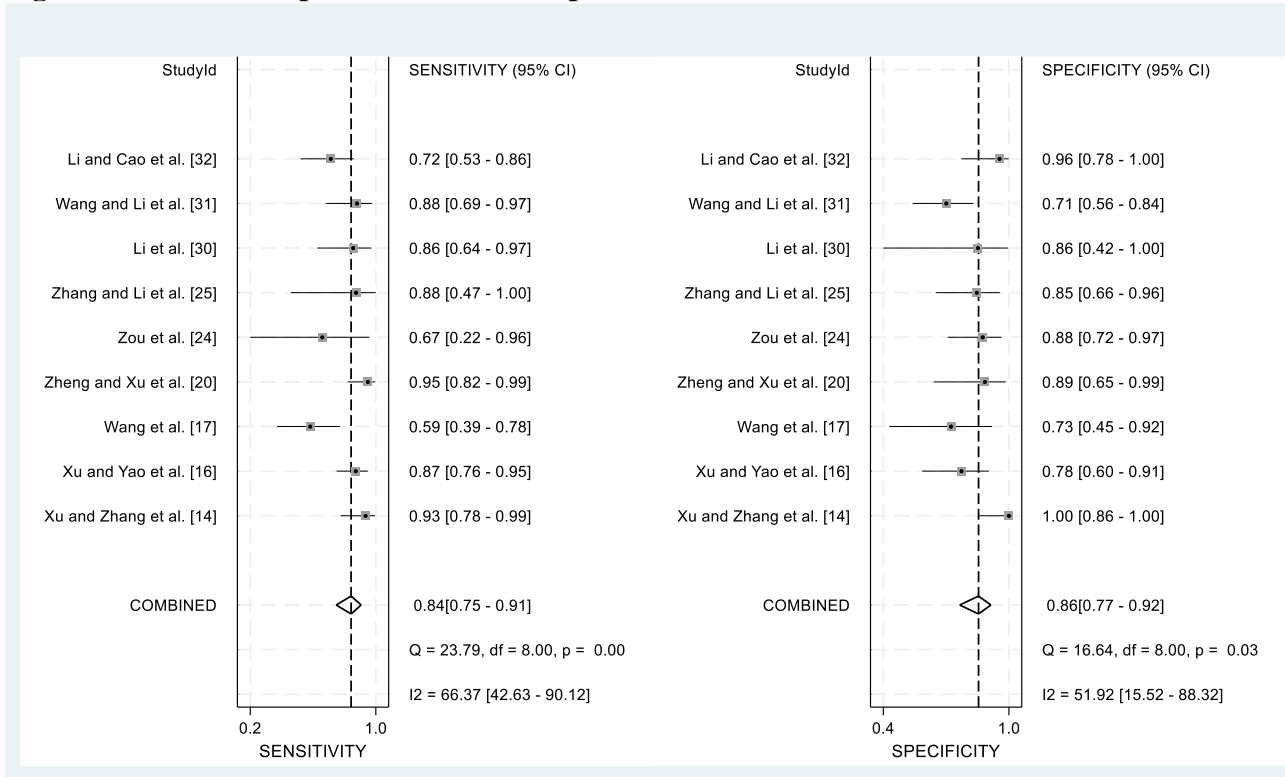



**Figure S5. The ROC plot for radiomics in the prediction of muscle-invasive bladder cancer**

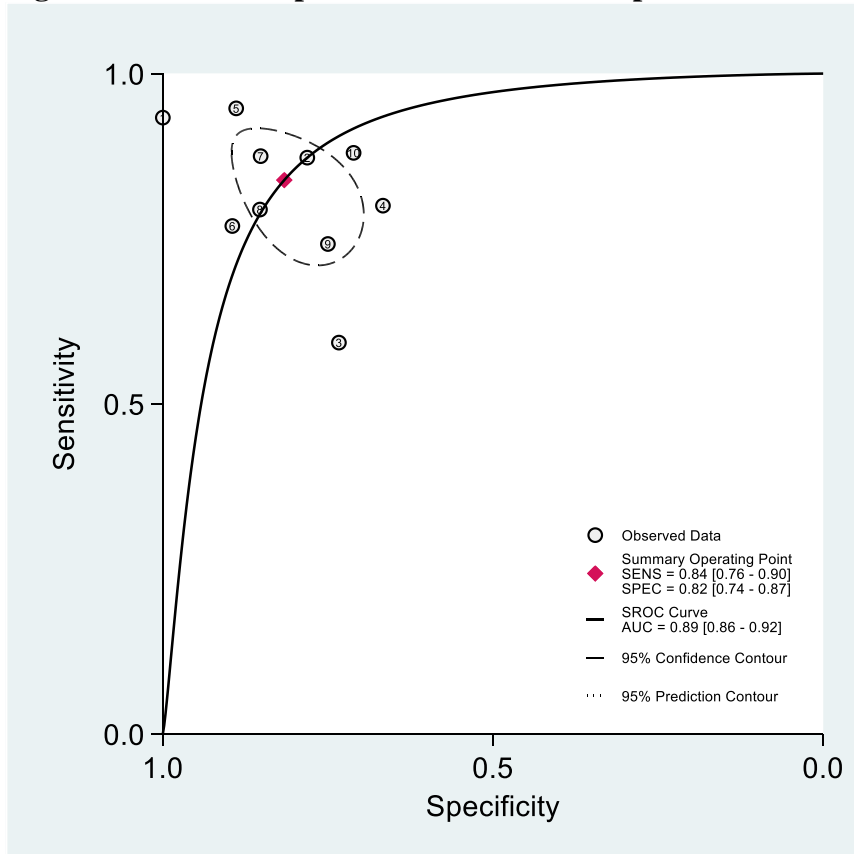

**Figure S6. The forest plot for radiomics in the prediction of muscle-invasive bladder cancer**

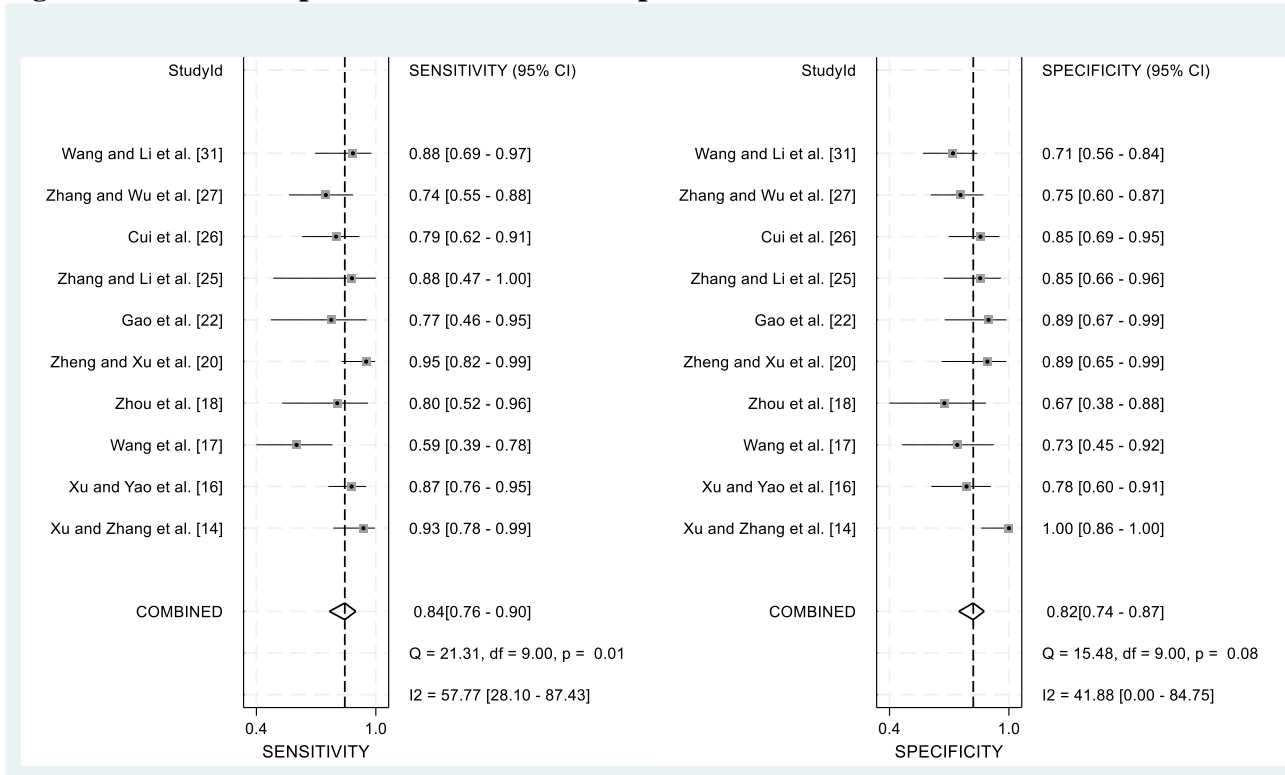

**Figure S7. The ROC plot for deep learning in the prediction of muscle-invasive bladder cancer**

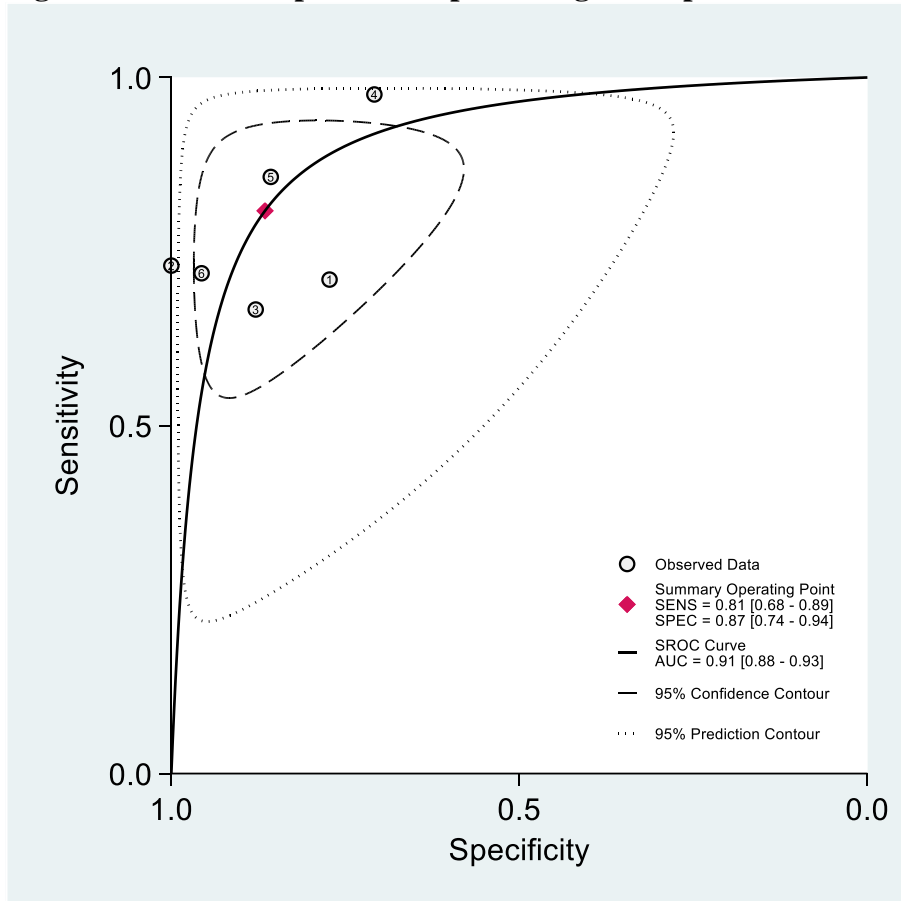

**Figure S8. The forest plot for deep learning in the prediction of muscle-invasive bladder cancer**

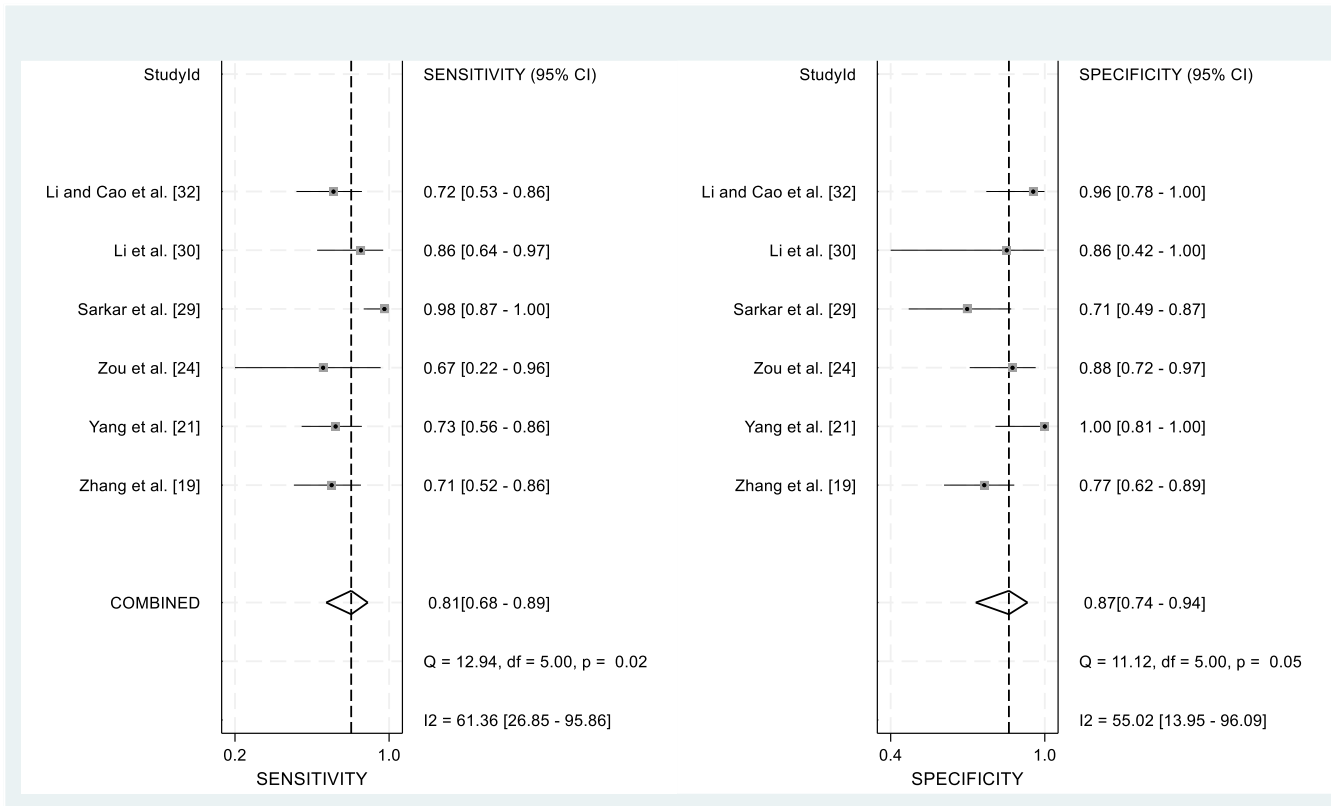

### Supplementary Material 3:

#### Meta-analysis Raw Data:

| citation               | tp | fp | tn | fn | sen    | spe    | AUC    | MIBC ratio | sample size |
|------------------------|----|----|----|----|--------|--------|--------|------------|-------------|
| Xu and Zhang et al.    | 28 | 0  | 24 | 2  | 0.926  | 1      | 0.9857 | 0.5556     | 54          |
| Xu and Yao et al.      | 48 | 7  | 25 | 7  | 0.873  | 0.781  | 0.907  | 0.6468     | 218         |
| Wang et al. [17]       | 16 | 4  | 11 | 11 | 0.6    | 0.741  | 0.672  | 0.566      | 106         |
| Zhou et al. [18]       | 12 | 5  | 10 | 3  | 0.8182 | 0.6842 | 0.782  | 0.5        | 100         |
| Zhang et al. [19]      | 22 | 10 | 34 | 9  | 0.71   | 0.773  | 0.791  | 0.2766     | 441         |
| Zheng and Xu et al.    | 36 | 2  | 16 | 2  | 0.9444 | 0.8684 | 0.906  | 0.3351     | 185         |
| Yang et al. [21]       | 27 | 0  | 18 | 10 | 0.722  | 1      | 0.998  | 0.3252     | 369         |
| Gao et al. [22]        | 10 | 2  | 17 | 3  | 0.77   | 0.89   | 0.84   | 0.4135     | 104         |
| Chen et al. [23]       | 10 | 7  | 26 | 1  | 0.909  | 0.788  | 0.884  | 0.2486     | 173         |
| Zou et al. [24]        | 4  | 4  | 29 | 2  | 0.667  | 0.879  | 0.856  | 0.2863     | 468         |
| Zhang and Li et al.    | 7  | 4  | 23 | 1  | 0.8909 | 0.8424 | 0.931  | 0.231      | 342         |
| Cui et al. [26]        | 27 | 5  | 29 | 7  | 0.794  | 0.853  | 0.894  | 0.5        | 188         |
| Zhang and Wu et al.    | 23 | 11 | 33 | 8  | 0.742  | 0.75   | 0.784  | 0.2766     | 441         |
| Sarkar et al. [29]     | 40 | 7  | 17 | 1  | 0.9675 | 0.6965 |        | 0.6307     | 65          |
| Li et al. [30]         | 18 | 1  | 6  | 3  | 0.857  | 0.857  | 0.932  | 0.3305     | 121         |
| Wang and Li et al.     | 22 | 13 | 32 | 3  | 0.88   | 0.711  | 0.711  | 0.3717     | 191         |
| Li and Cao et al. [31] | 23 | 1  | 22 | 9  | 0.719  | 0.957  | 0.861  | 0.2884     | 215         |

**CLAIM:**

|                                       | item_num     | detail           | Xu et al. | Garapati | Xu and Z | Zheng et | Xu and Y | Wang et | Zhou et a | Zhang et | Zheng an | Yang et a | Gao et al. | Chen et | Zou et al. | Zhang an | Cui et al. | Zhang an | Liu et al. | Sarkar et | Li et al. | Wang an | Li and Cao et al. | adherenc | total | stud    | adherenc |         |
|---------------------------------------|--------------|------------------|-----------|----------|----------|----------|----------|---------|-----------|----------|----------|-----------|------------|---------|------------|----------|------------|----------|------------|-----------|-----------|---------|-------------------|----------|-------|---------|----------|---------|
| TITLE or<br>ABSTR<br>INTROD<br>UCTION | 1            | Identification   | 1         | 1        | 1        | 1        | 1        | 1       | 1         | 1        | 1        | 1         | 1          | 1       | 1          | 1        | 1          | 1        | 1          | 1         | 1         | 1       | 1                 | 1        | 21    | 21      | 1        |         |
|                                       | 2            | Structured su    | 1         | 1        | 1        | 1        | 1        | 1       | 1         | 1        | 1        | 1         | 1          | 1       | 1          | 1        | 1          | 1        | 1          | 1         | 0         | 1       | 1                 | 1        | 20    | 21      | 0.95238  |         |
|                                       | 3            | Scientific and   | 1         | 1        | 1        | 1        | 1        | 1       | 1         | 1        | 1        | 1         | 1          | 1       | 1          | 1        | 1          | 1        | 1          | 1         | 1         | 1       | 1                 | 1        | 21    | 21      | 1        |         |
|                                       | 4            | Study objecti    | 1         | 1        | 1        | 1        | 1        | 1       | 1         | 1        | 1        | 1         | 1          | 1       | 1          | 1        | 1          | 1        | 1          | 1         | 0         | 1       | 1                 | 1        | 20    | 21      | 0.95238  |         |
|                                       | 5            | Prospective e    | 1         | 1        | 1        | 1        | 1        | 1       | 1         | 1        | 1        | 1         | 1          | 1       | 1          | 1        | 1          | 1        | 1          | 1         | 1         | 1       | 1                 | 1        | 21    | 21      | 1        |         |
|                                       | 6            | Study goal, s    | 1         | 1        | 1        | 1        | 1        | 1       | 1         | 1        | 1        | 1         | 1          | 1       | 1          | 1        | 1          | 1        | 1          | 1         | 1         | 1       | 1                 | 1        | 21    | 21      | 1        |         |
|                                       | 7            | Data sources     | 1         | 1        | 1        | 1        | 1        | 1       | 1         | 1        | 1        | 1         | 1          | 1       | 1          | 1        | 1          | 1        | 1          | 1         | 1         | 1       | 1                 | 1        | 21    | 21      | 1        |         |
|                                       | 8            | Eligibility crit | 1         | 0        | 1        | 1        | 1        | 1       | 1         | 1        | 1        | 1         | 1          | 1       | 1          | 1        | 1          | 1        | 1          | 1         | 0         | 1       | 1                 | 1        | 19    | 21      | 0.90476  |         |
|                                       | 9            | Data preproc     | 0         | 0        | 1        | 0        | 0        | 0       | 0         | 1        | 1        | 0         | 1          | 1       | 1          | 1        | 0          | 0        | 0          | 0         | 0         | 0       | 1                 | 0        | 1     | 9       | 21       | 0.42857 |
|                                       | 10           | Selection of     | NA        | NA       | NA       | NA       | NA       | NA      | NA        | NA       | NA       | NA        | NA         | NA      | NA         | NA       | NA         | NA       | NA         | NA        | NA        | NA      | NA                | NA       | 1     | 1       | 1        |         |
|                                       | 11           | Definitions of   | 1         | 1        | 1        | 1        | 1        | 1       | 1         | 1        | 1        | 1         | 1          | 1       | 1          | 1        | 1          | 1        | 1          | 1         | 1         | 1       | 1                 | 1        | 1     | 21      | 21       | 1       |
|                                       | 12           | De-identifica    | 0         | 0        | 0        | 0        | 0        | 0       | 0         | 0        | 0        | 0         | 0          | 0       | 0          | 0        | 0          | 0        | 0          | 0         | 0         | 0       | 0                 | 0        | 0     | 0       | 21       | 0       |
|                                       | 13           | How missing      | 0         | 0        | 0        | 0        | 0        | 0       | 0         | 1        | 0        | 0         | 0          | 1       | 0          | 0        | 0          | 0        | 0          | 0         | 0         | 0       | 0                 | 0        | 0     | 2       | 21       | 0.09524 |
| METHO<br>DS                           | 14           | Definition of    | 1         | 0        | 0        | 1        | 1        | 1       | 1         | 1        | 1        | 1         | 0          | 1       | 1          | 1        | 1          | 1        | 1          | 0         | 1         | 1       | 1                 | 1        | 16    | 21      | 0.7619   |         |
|                                       | 15           | Rationale for    | NA        | 0        | 0        | 0        | 1        | 0       | 0         | 0        | 0        | NA        | 0          | 0       | NA         | NA       | 0          | 0        | 0          | NA        | 0         | 0       | 0                 | 0        | 1     | 16      | 0.0625   |         |
|                                       | 16           | Source of gro    | 0         | 0        | 0        | 0        | 1        | 0       | 0         | 0        | 0        | 0         | 0          | 0       | 0          | 0        | 0          | 0        | 0          | 0         | 0         | 0       | 0                 | 0        | 1     | 21      | 0.04762  |         |
|                                       | 17           | Annotation to    | 0         | 0        | 0        | 0        | 0        | 0       | 0         | 0        | 0        | 0         | 0          | 0       | 0          | 0        | 0          | 0        | 0          | 0         | 0         | 0       | 0                 | 0        | 0     | 21      | 0        |         |
|                                       | 18           | Measurement      | 0         | 0        | 0        | 0        | 0        | 0       | 0         | 0        | 0        | 0         | 0          | 0       | 0          | 0        | 0          | 0        | 0          | 0         | 0         | 0       | 0                 | 0        | 0     | 21      | 0        |         |
|                                       | 19           | Intended sam     | 0         | 0        | 0        | 0        | 0        | 0       | 0         | 0        | 0        | 0         | 0          | 0       | 0          | 0        | 0          | 0        | 0          | 0         | 0         | 0       | 0                 | 0        | 0     | 21      | 0        |         |
|                                       | 20           | How data we      | 1         | 1        | 1        | 1        | 1        | 1       | 1         | 1        | 1        | 1         | 1          | 1       | 1          | 1        | 1          | 1        | 1          | 1         | 1         | 1       | 1                 | 1        | 21    | 21      | 1        |         |
|                                       | 21           | Level at whic    | 1         | 1        | 1        | 1        | 1        | 1       | 1         | 1        | 1        | 1         | 1          | 1       | 1          | 1        | 1          | 1        | 1          | 1         | 1         | 1       | 1                 | 1        | 1     | 21      | 21       | 1       |
|                                       | 22           | Detailed desc    | 1         | 1        | 1        | 1        | 1        | 1       | 1         | 1        | 0        | 1         | 1          | 1       | 1          | 1        | 1          | 1        | 1          | 1         | 1         | 1       | 1                 | 1        | 1     | 20      | 21       | 0.95238 |
|                                       | 23           | Software libr    | 0         | 0        | 0        | 1        | 1        | 1       | 1         | 1        | 1        | 1         | 1          | 1       | 1          | 1        | 1          | 1        | 1          | 1         | 1         | 1       | 1                 | 1        | 1     | 18      | 21       | 0.85714 |
|                                       | 24           | Initialization e | 0         | 0        | 0        | 0        | 0        | 0       | 0         | 0        | 0        | 0         | 1          | 0       | 1          | 0        | 0          | 0        | 0          | 0         | 1         | 0       | 0                 | 0        | 3     | 21      | 0.14286  |         |
|                                       | 25           | Details of tra   | 1         | 1        | 1        | 1        | 1        | 1       | 1         | 1        | 1        | 1         | 1          | 1       | 1          | 1        | 1          | 1        | 1          | 1         | 1         | 1       | 1                 | 1        | 21    | 21      | 1        |         |
|                                       | 26           | Method of se     | 1         | 1        | 1        | 1        | 1        | 1       | 1         | 1        | 1        | 1         | 1          | 1       | 1          | 1        | 1          | 1        | 1          | 1         | 1         | 1       | 1                 | 1        | 21    | 21      | 1        |         |
| 27                                    | Ensembling t | NA               | NA        | NA       | NA       | NA       | NA       | NA      | NA        | NA       | NA       | NA        | NA         | NA      | NA         | NA       | NA         | NA       | NA         | NA        | NA        | NA      | NA                | 0        | 0     | #DIV/0! |          |         |
| Evaluatio<br>n                        | 28           | Metrics of m     | 1         | 1        | 1        | 1        | 1        | 1       | 1         | 1        | 1        | 1         | 1          | 1       | 1          | 1        | 1          | 1        | 1          | 1         | 1         | 1       | 1                 | 21       | 21    | 1       |          |         |
|                                       | 29           | Statistical me   | 1         | 1        | 1        | 1        | 1        | 0       | 1         | 1        | 1        | 0         | 0          | 1       | 1          | 1        | 1          | 1        | 1          | 1         | 1         | 1       | 1                 | 1        | 18    | 21      | 0.85714  |         |
|                                       | 30           | Robustness c     | 0         | 0        | 0        | 0        | 0        | 0       | 0         | 0        | 0        | 0         | 0          | 0       | 0          | 0        | 0          | 0        | 0          | 0         | 0         | 0       | 0                 | 0        | 0     | 21      | 0        |         |
|                                       | 31           | Methods for      | 0         | 0        | 0        | 0        | 0        | 0       | 0         | 1        | 0        | 1         | 0          | 0       | 1          | 0        | 0          | 0        | 0          | 0         | 1         | 0       | 1                 | 0        | 5     | 21      | 0.2381   |         |
|                                       | 32           | Validation or    | 0         | 0        | 0        | 1        | 0        | 1       | 0         | 1        | 0        | 0         | 0          | 0       | 1          | 0        | 0          | 1        | 0          | 0         | 1         | 0       | 1                 | 0        | 7     | 21      | 0.33333  |         |
|                                       | 33           | Flow of parti    | 0         | 0        | 1        | 1        | 0        | 1       | 1         | 1        | 1        | 0         | 1          | 1       | 0          | 0        | 1          | 0        | 1          | 0         | 1         | 1       | 1                 | 1        | 13    | 21      | 0.61905  |         |
| RESULT<br>S                           | 34           | Demographic      | 0         | 0        | 1        | 1        | 1        | 1       | 1         | 1        | 1        | 1         | 1          | 1       | 1          | 1        | 1          | 1        | 1          | 1         | 0         | 1       | 1                 | 1        | 18    | 21      | 0.85714  |         |
|                                       | 35           | Performance      | 1         | 1        | 1        | 1        | 1        | 1       | 1         | 1        | 1        | 1         | 1          | 1       | 1          | 1        | 1          | 1        | 1          | 1         | 1         | 1       | 1                 | 1        | 21    | 21      | 1        |         |
|                                       | 36           | Estimates of     | 1         | 1        | 1        | 1        | 0        | 1       | 1         | 1        | 1        | 0         | 0          | 1       | 1          | 1        | 1          | 1        | 1          | 1         | 1         | 1       | 1                 | 1        | 18    | 21      | 0.85714  |         |
|                                       | 37           | Failure analy    | 0         | 1        | 0        | 0        | 0        | 0       | 0         | 0        | 0        | 0         | 0          | 0       | 0          | 1        | 0          | 0        | 0          | 0         | 0         | 0       | 0                 | 0        | 3     | 21      | 0.14286  |         |
| DISCUS<br>SION                        | 38           | Study limitati   | 1         | 1        | 1        | 1        | 1        | 1       | 1         | 1        | 1        | 1         | 1          | 1       | 1          | 1        | 1          | 1        | 1          | 1         | 1         | 1       | 1                 | 1        | 21    | 21      | 1        |         |
|                                       | 39           | Implications     | 1         | 1        | 1        | 1        | 1        | 1       | 0         | 1        | 1        | 1         | 1          | 1       | 1          | 1        | 0          | 0        | 1          | 1         | 0         | 0       | 0                 | 1        | 15    | 21      | 0.71429  |         |
| OTHER                                 | 40           | Registration i   | 0         | 1        | 1        | 1        | 1        | 1       | 1         | 1        | 1        | 1         | 1          | 1       | 1          | 1        | 1          | 1        | 1          | 0         | 1         | 1       | 1                 | 19       | 21    | 0.90476 |          |         |
| INFORM<br>ATION                       | 41           | Where the fu     | 0         | 0        | 0        | 0        | 0        | 0       | 0         | 0        | 0        | 0         | 0          | 0       | 0          | 0        | 0          | 0        | 0          | 0         | 0         | 0       | 0                 | 0        | 0     | 21      | 0        |         |
|                                       | 42           | Sources of fu    | 1         | 0        | 0        | 1        | 1        | 1       | 1         | 1        | 1        | 1         | 0          | 0       | 0          | 1        | 0          | 0        | 1          | 0         | 1         | 1       | 1                 | 1        | 13    | 21      | 0.61905  |         |
|                                       |              | adherence i      | 22        | 21       | 24       | 27       | 25       | 27      | 26        | 28       | 26       | 25        | 24         | 27      | 29         | 23       | 25         | 26       | 23         | 21        | 28        | 25      | 30                |          |       |         |          |         |
|                                       |              | total items      | 39        | 40       | 40       | 40       | 40       | 40      | 40        | 40       | 40       | 39        | 40         | 40      | 39         | 39       | 41         | 40       | 40         | 39        | 40        | 40      | 40                |          |       |         |          |         |
|                                       |              | adherence i      | 0.5641    | 0.525    | 0.6      | 0.675    | 0.625    | 0.675   | 0.65      | 0.7      | 0.65     | 0.64103   | 0.6        | 0.675   | 0.74359    | 0.58974  | 0.60976    | 0.65     | 0.575      | 0.53846   | 0.7       | 0.625   | 0.75              |          |       |         |          |         |

Insights Imaging (2024) He C, Xu H, Yuan E, et al.

RQS:

|                                                                                 | Xu et al.      | Garapati       | Xu and Z       | Zheng et Xu and Y | Wang et Zhou et a | Zhang et Zheng an | Yang et a      | Gao et al.     | Chen et Zou et al. | Zhang an       | Cui et al.  | Zhang an       | Liu et al.     | Sarkar et Li et al. | Wang an        | Li and Cao et al. | 3              | mean poi       | median p    | mean per       | median percentage | per item |         |         |         |   |
|---------------------------------------------------------------------------------|----------------|----------------|----------------|-------------------|-------------------|-------------------|----------------|----------------|--------------------|----------------|-------------|----------------|----------------|---------------------|----------------|-------------------|----------------|----------------|-------------|----------------|-------------------|----------|---------|---------|---------|---|
| criterion 1 Image protocol quality - well-documented image protocols (6)        | 1              | 0              | 1              | 1                 | 1                 | 1                 | 0              | 1              | 1                  | 1              | 1           | 1              | 1              | 1                   | 1              | 1                 | 1              | 0              | 1           | 1              | 1                 | 0.85714  | 1       | 0.42857 | 0.5     |   |
| <b>checkpoint_1</b>                                                             | <b>1</b>       | <b>0</b>       | <b>1</b>       | <b>1</b>          | <b>1</b>          | <b>1</b>          | <b>0</b>       | <b>1</b>       | <b>1</b>           | <b>1</b>       | <b>1</b>    | <b>1</b>       | <b>1</b>       | <b>1</b>            | <b>1</b>       | <b>1</b>          | <b>1</b>       | <b>0</b>       | <b>1</b>    | <b>1</b>       | <b>1</b>          |          |         |         |         |   |
| criterion 2 Multiple segmentations - possible actions are: segmentation b       | 1              | 0              | 0              | 1                 | 1                 | 1                 | 1              | 1              | 1                  | 1              | 1           | 0              | 1              | 1                   | 1              | 1                 | 0              | 0              | 0           | 1              | 0                 | 0.71429  | 1       | 0.35714 | 0.5     |   |
| criterion 3 Phantom study on all scanners - detect inter-scanner differer       | 0              | 0              | 0              | 0                 | 0                 | 0                 | 0              | 0              | 0                  | 0              | 0           | 0              | 0              | 0                   | 0              | 0                 | 0              | 0              | 0           | 0              | 0                 | 0        | 0       | 0       | 0       |   |
| criterion 4 Imaging at multiple time points - collect images of individuals     | 0              | 0              | 0              | 0                 | 0                 | 0                 | 0              | 0              | 0                  | 0              | 0           | 0              | 0              | 0                   | 0              | 0                 | 0              | 0              | 0           | 0              | 0                 | 0        | 0       | 0       | 0       |   |
| <b>checkpoint_2</b>                                                             | <b>1</b>       | <b>0</b>       | <b>0</b>       | <b>1</b>          | <b>1</b>          | <b>1</b>          | <b>1</b>       | <b>1</b>       | <b>1</b>           | <b>1</b>       | <b>1</b>    | <b>1</b>       | <b>0</b>       | <b>1</b>            | <b>1</b>       | <b>1</b>          | <b>1</b>       | <b>0</b>       | <b>0</b>    | <b>1</b>       | <b>0</b>          |          |         |         |         |   |
| criterion 5 Feature reduction or adjustment for multiple testing - decreas      | 3              | 3              | 3              | 3                 | 3                 | 3                 | 3              | 0              | 3                  | 0              | 3           | 3              | 0              | 3                   | 3              | 3                 | 3              | 3              | 3           | 3              | 0                 | 2.42857  | 3       | 1.21429 | 1.5     |   |
| criterion 6 Multivariable analysis with non radiomics features (for exam        | 0              | 0              | 0              | 1                 | 1                 | 1                 | 1              | 0              | 1                  | 0              | 0           | 0              | 0              | 1                   | 0              | 0                 | 0              | 0              | 0           | 0              | 1                 | 0        | 0.33333 | 0       | 0.16667 | 0 |
| criterion 7 Detect and discuss biological correlates - demonstration of p       | 0              | 0              | 0              | 0                 | 0                 | 0                 | 0              | 0              | 0                  | 0              | 1           | 0              | 0              | 0                   | 0              | 0                 | 0              | 0              | 0           | 0              | 0                 | 0.04762  | 0       | 0.02381 | 0       |   |
| criterion 8 Cut-off analyses - determine risk groups by either the medai        | 0              | 0              | 0              | 1                 | 0                 | 1                 | 0              | 1              | 1                  | 0              | 0           | 0              | 0              | 1                   | 1              | 1                 | 0              | 0              | 0           | 1              | 1                 | 0.42857  | 0       | 0.21429 | 0       |   |
| criterion 9 Discrimination statistics - report discrimination statistics (for   | 1              | 2              | 2              | 2                 | 1                 | 1                 | 1              | 1              | 1                  | 1              | 1           | 1              | 1              | 1                   | 1              | 2                 | 2              | 0              | 2           | 1              | 1                 | 1.2381   | 1       | 0.61905 | 0.5     |   |
| criterion 10 Calibration statistics - report calibration statistics (for exampl | 0              | 0              | 0              | 2                 | 0                 | 1                 | 1              | 1              | 1                  | 0              | 0           | 0              | 0              | 1                   | 0              | 1                 | 0              | 0              | 0           | 0              | 1                 | 0.42857  | 0       | 0.21429 | 0       |   |
| criterion 11 Prospective study registered in a trial database - provides the    | 0              | 0              | 0              | 0                 | 0                 | 0                 | 0              | 0              | 0                  | 0              | 0           | 0              | 7              | 0                   | 0              | 0                 | 0              | 0              | 0           | 0              | 0                 | 0.33333  | 0       | 0.16667 | 0       |   |
| criterion 12 Validation - the validation is performed without retraining and    | -5             | 2              | 2              | 3                 | 2                 | 3                 | 2              | 3              | 2                  | 2              | 2           | 2              | 4              | 2                   | 2              | 3                 | 2              | 2              | 3           | 2              | 3                 | 2.04762  | 2       | 1.02381 | 1       |   |
| criterion 13 Comparison to 'gold standard' - assess the extent to which th      | 0              | 0              | 0              | 2                 | 2                 | 2                 | 0              | 2              | 2                  | 0              | 0           | 0              | 0              | 2                   | 0              | 2                 | 0              | 2              | 0           | 2              | 2                 | 0.85714  | 0       | 0.42857 | 0       |   |
| criterion 14 Potential clinical utility - report on the current and potential a | 0              | 0              | 0              | 2                 | 0                 | 2                 | 2              | 2              | 2                  | 0              | 0           | 0              | 0              | 2                   | 2              | 0                 | 0              | 0              | 0           | 0              | 2                 | 0.7619   | 0       | 0.38095 | 0       |   |
| criterion 15 Cost-effectiveness analysis - report on the cost-effectiveness     | 0              | 0              | 0              | 0                 | 0                 | 0                 | 0              | 0              | 0                  | 0              | 0           | 0              | 0              | 0                   | 0              | 0                 | 0              | 0              | 0           | 0              | 0                 | 0        | 0       | 0       | 0       |   |
| criterion 16 Open science and data - make code and data publicly availabl       | 0              | 0              | 0              | 0                 | 0                 | 0                 | 0              | 0              | 0                  | 0              | 0           | 0              | 0              | 0                   | 0              | 0                 | 0              | 0              | 0           | 0              | 0                 | 0        | 0       | 0       | 0       |   |
| <b>checkpoint_3</b>                                                             | <b>-1</b>      | <b>7</b>       | <b>7</b>       | <b>16</b>         | <b>9</b>          | <b>14</b>         | <b>10</b>      | <b>10</b>      | <b>13</b>          | <b>3</b>       | <b>7</b>    | <b>6</b>       | <b>12</b>      | <b>11</b>           | <b>11</b>      | <b>10</b>         | <b>9</b>       | <b>5</b>       | <b>8</b>    | <b>10</b>      | <b>10</b>         |          |         |         |         |   |
| <b>total points</b>                                                             | <b>1</b>       | <b>7</b>       | <b>8</b>       | <b>18</b>         | <b>11</b>         | <b>16</b>         | <b>11</b>      | <b>12</b>      | <b>15</b>          | <b>5</b>       | <b>9</b>    | <b>8</b>       | <b>13</b>      | <b>13</b>           | <b>13</b>      | <b>12</b>         | <b>11</b>      | <b>5</b>       | <b>9</b>    | <b>12</b>      | <b>11</b>         |          |         |         |         |   |
| <b>total percentage (n/36)</b>                                                  | <b>0.02778</b> | <b>0.19444</b> | <b>0.22222</b> | <b>0.5</b>        | <b>0.30556</b>    | <b>0.44444</b>    | <b>0.30556</b> | <b>0.33333</b> | <b>0.41667</b>     | <b>0.13889</b> | <b>0.25</b> | <b>0.22222</b> | <b>0.36111</b> | <b>0.36111</b>      | <b>0.36111</b> | <b>0.33333</b>    | <b>0.30556</b> | <b>0.13889</b> | <b>0.25</b> | <b>0.33333</b> | <b>0.30556</b>    |          |         |         |         |   |

## RQS Checklist:

|              |                                                                                                                                                                                                                                                                                               | Points and Interpretation                                                                                                                                                                                                                                                                                                                                                                                                                                                                    |
|--------------|-----------------------------------------------------------------------------------------------------------------------------------------------------------------------------------------------------------------------------------------------------------------------------------------------|----------------------------------------------------------------------------------------------------------------------------------------------------------------------------------------------------------------------------------------------------------------------------------------------------------------------------------------------------------------------------------------------------------------------------------------------------------------------------------------------|
| critereon 1  | Image protocol quality - well-documented image protocols (for example, contrast, slice thickness, energy, etc.) and/or usage of public image protocols allow reproducibility/replicability<br><b>checkpoint 1</b>                                                                             | + 1 if protocols are well-documented<br>+ 1 if public protocol is used                                                                                                                                                                                                                                                                                                                                                                                                                       |
| critereon 2  | Multiple segmentations - possible actions are: segmentation by different physicians/algorithms/software, perturbing segmentations by (random) noise, segmentation at different breathing cycles. Analyse feature robustness to segmentation variabilities                                     | + 1 if segmented multiple times (different physicians, algorithms, or perturbation of regions of interest)                                                                                                                                                                                                                                                                                                                                                                                   |
| critereon 3  | Phantom study on all scanners - detect inter-scanner differences and vendor-dependent features. Analyse feature robustness to these sources of variability                                                                                                                                    | + 1 if texture phantoms were used for feature robustness assessment                                                                                                                                                                                                                                                                                                                                                                                                                          |
| critereon 4  | Imaging at multiple time points - collect images of individuals at additional time points. Analyse feature robustness to temporal variabilities (for example, organ movement, organ expansion/shrinkage)<br><b>checkpoint 2</b>                                                               | + 1 multiple time points for feature robustness assessment                                                                                                                                                                                                                                                                                                                                                                                                                                   |
| critereon 5  | Feature reduction or adjustment for multiple testing - decreases the risk of overfitting. Overfitting is inevitable if the number of features exceeds the number of samples. Consider feature robustness when selecting features                                                              | - 3 if neither measure is implemented<br>+ 3 if either measure is implemented                                                                                                                                                                                                                                                                                                                                                                                                                |
| critereon 6  | Multivariable analysis with non radiomics features (for example, EGFR mutation) - is expected to provide a more holistic model. Permits correlating/inferencing between radiomics and non radiomics features                                                                                  | + 1 if multivariable analysis with nonradiomics features                                                                                                                                                                                                                                                                                                                                                                                                                                     |
| critereon 7  | Detect and discuss biological correlates - demonstration of phenotypic differences (possibly associated with underlying gene-protein expression patterns) deepens understanding of radiomics and biology                                                                                      | + 1 if present                                                                                                                                                                                                                                                                                                                                                                                                                                                                               |
| critereon 8  | Cut-off analyses - determine risk groups by either the median, a previously published cut-off or report a continuous risk variable. Reduces the risk of reporting overly optimistic results                                                                                                   | + 1 if cutoff either pre-defined or at median or continuous risk variable reported                                                                                                                                                                                                                                                                                                                                                                                                           |
| critereon 9  | Discrimination statistics - report discrimination statistics (for example, C-statistic, ROC curve, AUC) and their statistical significance (for example, p-values, confidence intervals). One can also apply resampling method (for example, bootstrapping, cross-validation)                 | + 1 if a discrimination statistic and its statistical significance are reported<br>+ 1 if a resampling method technique is also applied                                                                                                                                                                                                                                                                                                                                                      |
| critereon 10 | Calibration statistics - report calibration statistics (for example, Calibration-in-the-large/slope, calibration plots) and their statistical significance (for example, P-values, confidence intervals). One can also apply resampling method (for example, bootstrapping, cross-validation) | + 1 if a calibration statistic and its statistical significance are reported<br>+ 1 if a resampling method technique is also applied                                                                                                                                                                                                                                                                                                                                                         |
| critereon 11 | Prospective study registered in a trial database - provides the highest level of evidence supporting the clinical validity and usefulness of the radiomics biomarker                                                                                                                          | + 7 for prospective validation of a radiomics signature in an appropriate trial                                                                                                                                                                                                                                                                                                                                                                                                              |
| critereon 12 | Validation - the validation is performed without retraining and without adaptation of the cut-off value, provides crucial information with regard to credible clinical performance                                                                                                            | -5 if validation is missing<br>+ 2 if validation is based on a dataset from the same institute/<br>+ 3 if validation is based on a dataset from another institute/<br>+ 4 if validation is based on two datasets from two distinct institutes/<br>+4 if the study validates a previously published signature/<br>+5 if validation is based on three or more datasets from distinct institutes<br>*Datasets should be of comparable size and should have at least 10 events per model feature |
| critereon 13 | Comparison to 'gold standard' - assess the extent to which the model agrees with/superior to the current 'gold standard' method (for example, TNM-staging for survival prediction). This comparison shows the added value of radiomics                                                        | + 2 for comparison to gold standard                                                                                                                                                                                                                                                                                                                                                                                                                                                          |
| critereon 14 | Potential clinical utility - report on the current and potential application of the model in a clinical setting (for example, decision curve analysis)                                                                                                                                        | + 2 for reporting potential clinical utility                                                                                                                                                                                                                                                                                                                                                                                                                                                 |
| critereon 15 | Cost-effectiveness analysis - report on the cost-effectiveness of the clinical application (for example, QALYs generated)                                                                                                                                                                     | + 1 for cost-effectiveness analysis                                                                                                                                                                                                                                                                                                                                                                                                                                                          |
| critereon 16 | Open science and data - make code and data publicly available. Open science facilitates knowledge transfer and reproducibility of the study<br><b>checkpoint 3</b>                                                                                                                            | + 1 if scans are open source<br>+ 1 if region of interest segmentations are open source<br>+ 1 if code is open source<br>+ 1 if radiomics features are calculated on a set of representative ROIs and the calculated features and representative ROIs are open source                                                                                                                                                                                                                        |
|              | <b>total points</b>                                                                                                                                                                                                                                                                           | <b>Total points (36 = 100%)</b>                                                                                                                                                                                                                                                                                                                                                                                                                                                              |
|              | <b>total percentage (n/36)</b>                                                                                                                                                                                                                                                                |                                                                                                                                                                                                                                                                                                                                                                                                                                                                                              |
|              | Extracted from Lambin P, Leijenaar RTH, Deist TM, et al. Radiomics: the bridge between medical imaging and personalized medicine. Nat Rev Clin Oncol. 2017;14(12):749-762.                                                                                                                    |                                                                                                                                                                                                                                                                                                                                                                                                                                                                                              |

Insights Imaging (2024) He C, Xu H, Yuan E, et al.



**PROBAST:**

|                           |                                                           | Xu et al.                        | Garapati | Xu and Z | Zheng et | Xu and Y | Wang et | Zhou et | Zhang et | Zheng an | Yang et | Gao et al. | Chen et | Zou et al. | Zhang an | Cui et al. | Zhang an | Liu et al. | Sarkar et | Li et al. | Wang an | Li and  | Cao et al. | 3  | number of | number of | number of no | information |    |
|---------------------------|-----------------------------------------------------------|----------------------------------|----------|----------|----------|----------|---------|---------|----------|----------|---------|------------|---------|------------|----------|------------|----------|------------|-----------|-----------|---------|---------|------------|----|-----------|-----------|--------------|-------------|----|
| DOMAIN 1:                 | A. Risk of Bias: Participants                             | 1.1 Were appropriate data sou    | Y        | Y        | Y        | Y        | Y       | Y       | Y        | Y        | Y       | Y          | Y       | Y          | Y        | Y          | Y        | Y          | Y         | Y         | Y       | Y       | Y          | Y  | 21        | 0         | 0            | 0           |    |
|                           |                                                           | 1.2 Were all inclusions and exc  | Y        | NI       | Y        | Y        | Y       | Y       | Y        | Y        | Y       | Y          | Y       | Y          | Y        | Y          | Y        | Y          | Y         | NI        | Y       | Y       | Y          | Y  | 19        | 0         | 0            | 2           |    |
|                           |                                                           | number of yes/probably yes       | 2        | 1        | 2        | 2        | 2       | 2       | 2        | 2        | 2       | 2          | 2       | 2          | 2        | 2          | 2        | 2          | 2         | 2         | 1       | 2       | 2          | 2  | 2         |           |              |             |    |
|                           |                                                           | number of no/probably no         | 0        | 0        | 0        | 0        | 0       | 0       | 0        | 0        | 0       | 0          | 0       | 0          | 0        | 0          | 0        | 0          | 0         | 0         | 0       | 0       | 0          | 0  | 0         |           |              |             |    |
|                           |                                                           | number of no information         | 0        | 1        | 0        | 0        | 0       | 0       | 0        | 0        | 0       | 0          | 0       | 0          | 0        | 0          | 0        | 0          | 0         | 1         | 0       | 0       | 0          | 0  |           |           |              |             |    |
|                           |                                                           | Risk of bias introduced by s     | low      | unclear  | low      | low      | low     | low     | low      | low      | low     | low        | low     | low        | low      | low        | low      | low        | low       | unclear   | low     | low     | low        |    |           |           |              |             |    |
| DOMAIN 2:                 | A. Risk of Bias: Predictors                               | 2.1 Were predictors defined an   | Y        | Y        | NI       | Y        | Y       | Y       | Y        | Y        | Y       | Y          | Y       | Y          | Y        | Y          | Y        | PN         | PN        | Y         | Y       | Y       |            | 18 | 2         | 0         | 1            |             |    |
|                           |                                                           | 2.2 Were predictor assessment    | Y        | Y        | NI       | NI       | NI      | Y       | NI       | Y        | NI      | NI         | Y       | NI         | N        | Y          | N        | Y          | NI        | NI        | NI      | NI      | NI         |    | 7         | 2         | 0            | 12          |    |
|                           |                                                           | 2.3 Are all predictors available | Y        | Y        | Y        | Y        | Y       | Y       | Y        | Y        | Y       | Y          | Y       | Y          | Y        | Y          | Y        | Y          | Y         | Y         | Y       | Y       | Y          |    | 21        | 0         | 0            | 0           |    |
|                           |                                                           | number of yes/probably yes       | 3        | 3        | 1        | 2        | 2       | 3       | 2        | 3        | 2       | 2          | 3       | 2          | 2        | 3          | 2        | 3          | 1         | 1         | 2       | 2       | 2          | 2  |           |           |              |             |    |
|                           |                                                           | number of no/probably no         | 0        | 0        | 0        | 0        | 0       | 0       | 0        | 0        | 0       | 0          | 0       | 0          | 0        | 0          | 0        | 0          | 1         | 1         | 0       | 0       | 0          |    |           |           |              |             |    |
|                           |                                                           | number of no information         | 0        | 0        | 2        | 1        | 1       | 0       | 1        | 0        | 1       | 1          | 0       | 1          | 0        | 0          | 0        | 1          | 1         | 1         | 1       | 1       | 1          |    |           |           |              |             |    |
|                           |                                                           | Risk of bias introduced by p     | low      | low      | unclear  | unclear  | unclear | low     | unclear  | low      | unclear | unclear    | low     | unclear    | high     | low        | high     | low        | high      | high      | unclear | unclear | unclear    |    |           |           |              |             |    |
| DOMAIN 3:                 | A. Risk of Bias: Describe the outcome, how it             | 3.1 Was the outcome determin     | Y        | NI       | PY       | PY       | Y       | PY      | PY       | PY       | PY      | NI         | PY      | PY         | PY       | PY         | PY       | NI         | NI        | PY        | PY      | PY      |            | 17 | 0         | 0         | 4            |             |    |
|                           |                                                           | 3.2 Was a prespecified or stan   | NI       | NI       | NI       | NI       | Y       | NI      | NI       | NI       | NI      | NI         | NI      | NI         | NI       | NI         | NI       | NI         | NI        | NI        | NI      | NI      | NI         |    | 1         | 0         | 0            | 20          |    |
|                           |                                                           | 3.3 Were predictors excluded f   | Y        | Y        | Y        | Y        | Y       | Y       | Y        | Y        | Y       | Y          | Y       | Y          | Y        | Y          | Y        | Y          | Y         | Y         | Y       | Y       | Y          |    | 21        | 0         | 0            | 0           |    |
|                           |                                                           | 3.4 Was the outcome defined a    | NI       | NI       | NI       | NI       | PY      | NI      | NI       | NI       | NI      | NI         | NI      | NI         | NI       | NI         | NI       | NI         | NI        | NI        | NI      | NI      | NI         | NI |           | 1         | 0            | 0           | 20 |
|                           |                                                           | 3.5 Was the outcome determin     | NI       | NI       | NI       | NI       | PY      | NI      | NI       | NI       | NI      | NI         | NI      | NI         | NI       | NI         | NI       | NI         | NI        | NI        | NI      | NI      | NI         |    | 1         | 0         | 0            | 20          |    |
|                           |                                                           | 3.6 Was the time interval betw   | Y        | NI       | Y        | Y        | Y       | Y       | Y        | Y        | Y       | Y          | Y       | Y          | Y        | Y          | Y        | NI         | NI        | Y         | Y       | Y       |            | 17 | 0         | 0         | 4            |             |    |
|                           |                                                           | number of yes/probably yes       | 3        | 1        | 3        | 3        | 6       | 3       | 3        | 3        | 3       | 3          | 1       | 3          | 3        | 3          | 3        | 1          | 1         | 3         | 3       | 3       | 3          |    |           |           |              |             |    |
|                           |                                                           | number of no/probably no         | 0        | 0        | 0        | 0        | 0       | 0       | 0        | 0        | 0       | 0          | 0       | 0          | 0        | 0          | 0        | 0          | 0         | 0         | 0       | 0       | 0          |    |           |           |              |             |    |
|                           |                                                           | number of no information         | 3        | 5        | 3        | 3        | 0       | 3       | 3        | 3        | 3       | 3          | 5       | 3          | 3        | 3          | 3        | 5          | 5         | 5         | 3       | 3       | 3          |    |           |           |              |             |    |
|                           |                                                           | Risk of bias introduced by t     | unclear  | unclear  | unclear  | unclear  | low     | unclear | unclear  | unclear  | unclear | unclear    | unclear | unclear    | unclear  | unclear    | unclear  | unclear    | unclear   | unclear   | unclear | unclear | unclear    |    |           |           |              |             |    |
| DOMAIN 4:                 | Risk of Bias: Describe numbers of participants, number of | 4.1 Were there a reasonable m    | N        | N        | N        | N        | N       | N       | NI       | N        | PY      | N          | N       | N          | N        | N          | N        | N          | N         | N         | N       | N       |            | 1  | 19        | 0         | 1            |             |    |
|                           |                                                           | 4.2 Were continuous and categ    | Y        | Y        | Y        | Y        | Y       | Y       | Y        | Y        | Y       | Y          | Y       | Y          | Y        | Y          | Y        | Y          | Y         | Y         | Y       | Y       | Y          |    | 21        | 0         | 0            | 0           |    |
|                           |                                                           | 4.3 Were all enrolled participar | Y        | Y        | Y        | Y        | Y       | Y       | Y        | Y        | Y       | Y          | Y       | Y          | Y        | Y          | N        | Y          | Y         | Y         | Y       | Y       | Y          |    | 20        | 1         | 0            | 0           |    |
|                           |                                                           | 4.4 Were participants with mis   | NI       | NI       | NI       | NI       | NI      | NI      | Y        | NI       | NI      | NI         | Y       | NI         | NI       | NI         | NI       | NI         | NI        | NI        | NI      | NI      | NI         | NI |           | 2         | 0            | 0           | 19 |
|                           |                                                           | 4.5 Was selection of predictors  | N        | Y        | Y        | Y        | Y       | Y       | Y        | N        | Y       | N          | Y       | Y          | Y        | N          | Y        | Y          | Y         | Y         | N       | Y       |            | 16 | 5         | 0         | 0            |             |    |
|                           |                                                           | 4.6 Were complexities in the d   | Y        | Y        | Y        | Y        | Y       | Y       | Y        | Y        | Y       | Y          | Y       | Y          | Y        | Y          | Y        | Y          | Y         | Y         | Y       | Y       |            | 21 | 0         | 0         | 0            |             |    |
|                           |                                                           | 4.7 Were relevant model perfo    | N        | N        | Y        | N        | Y       | Y       | Y        | Y        | N       | N          | N       | N          | Y        | N          | Y        | N          | N         | N         | N       | Y       |            | 8  | 13        | 0         | 0            |             |    |
|                           |                                                           | 4.8 Were model overfitting, un   | Y        | Y        | Y        | N        | N       | N       | N        | N        | N       | N          | N       | N          | N        | N          | Y        | Y          | Y         | Y         | Y       | N       | Y          |    | 7         | 14        | 0            | 0           |    |
|                           |                                                           | 4.9 Do predictors and their ass  | Y        | Y        | Y        | Y        | Y       | Y       | Y        | Y        | Y       | Y          | Y       | Y          | Y        | Y          | Y        | Y          | Y         | Y         | Y       | Y       | Y          |    | 21        | 0         | 0            | 0           |    |
|                           |                                                           | number of yes/probably yes       | 4        | 6        | 6        | 7        | 5       | 6       | 7        | 6        | 5       | 6          | 5       | 5          | 5        | 6          | 3        | 7          | 6         | 6         | 6       | 4       | 6          |    |           |           |              |             |    |
|                           |                                                           | number of no/probably no         | 4        | 2        | 2        | 1        | 3       | 2       | 2        | 1        | 3       | 2          | 4       | 3          | 3        | 2          | 5        | 1          | 2         | 2         | 2       | 4       | 2          |    |           |           |              |             |    |
|                           |                                                           | number of no information         | 1        | 1        | 1        | 1        | 1       | 1       | 0        | 2        | 1       | 1          | 0       | 1          | 1        | 1          | 1        | 1          | 1         | 1         | 1       | 1       | 1          |    |           |           |              |             |    |
|                           |                                                           | Risk of bias introduced by t     | high     | high     | high     | high     | high    | high    | high     | high     | high    | high       | high    | high       | high     | high       | high     | high       | high      | high      | high    | high    | high       |    |           |           |              |             |    |
|                           |                                                           | total number of yes/probably     | 12       | 11       | 12       | 14       | 15      | 14      | 14       | 14       | 12      | 13         | 11      | 12         | 12       | 14         | 10       | 15         | 10        | 9         | 13      | 11      | 13         |    |           |           |              |             |    |
|                           |                                                           | total number of no/probably      | 4        | 2        | 2        | 1        | 3       | 2       | 2        | 1        | 3       | 2          | 4       | 3          | 4        | 2          | 6        | 1          | 3         | 3         | 2       | 4       | 2          |    |           |           |              |             |    |
|                           |                                                           | total number of no informati     | 4        | 7        | 6        | 5        | 2       | 4       | 4        | 5        | 5       | 5          | 5       | 5          | 4        | 4          | 4        | 4          | 7         | 8         | 5       | 5       | 5          |    |           |           |              |             |    |
| Overall judgement of risk |                                                           | total Risk of bias               | high     | high     | high     | high     | high    | high    | high     | high     | high    | high       | high    | high       | high     | high       | high     | high       | high      | high      | high    | high    |            |    |           |           |              |             |    |

Insights Imaging (2024) He C, Xu H, Yuan E, et al.
